# Supplementary material for: A sequentially switchable molecular dielectric material tuned by the stepwise ordering in diisopropylammonium trifluoromethanesulfonate
Source: Royal Society of Chemistry journal article supplement (doi:10.1039/c3tc32238f), 2014-01-01
Supplement: c3tc32238f.pdf [file c3tc32238f.pdf]

## Supplementary Information

# Sequently Switchable Molecular Dielectric Tuned by the Stepwise Ordering in Diisopropylammonium Trifluoromethanesulfonate

Pan Zhou,<sup>a,c</sup> Zhihua Sun,<sup>a,b</sup> Shuquan Zhang,<sup>a,b</sup> Chengmin Ji,<sup>a</sup> Sangen Zhao,<sup>a</sup> Rengen Xiong,<sup>d</sup> Junhua Luo<sup>a,b,\*</sup>

<sup>a</sup>Key Laboratory of Optoelectronic Materials Chemistry and Physics, Fujian Institute of Research on the Structure of Matter, Chinese Academy of Sciences, Fuzhou, Fujian, 350002, P.R. China.

<sup>b</sup>State Key Laboratory of Structural Chemistry, Fujian Institute of Research on the Structure of Matter, Chinese Academy of Sciences, Fuzhou, Fujian, 350002, P.R. China.

<sup>c</sup>Graduate School of the Chinese Academy of Sciences, Beijing 100039, China

<sup>d</sup>Ordered Matter Science Research Center, College of Chemistry and Chemical Engineering, Southeast University, Nanjing 211189, P.R. China

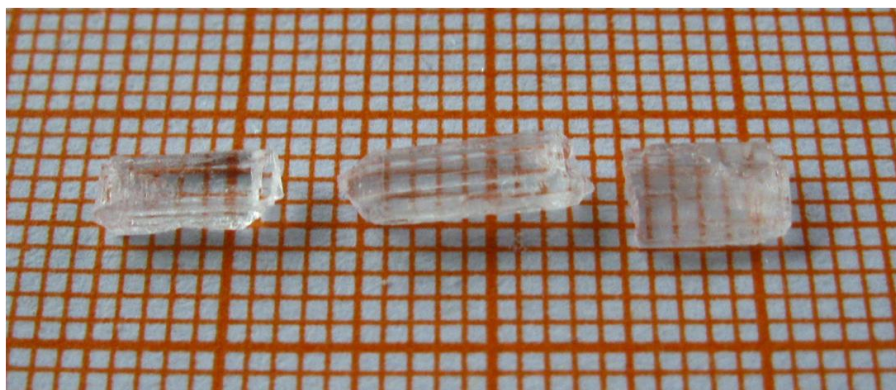

**Figure S1.** Bulk crystals of **1** grown by slow evaporation from the aqueous solution.

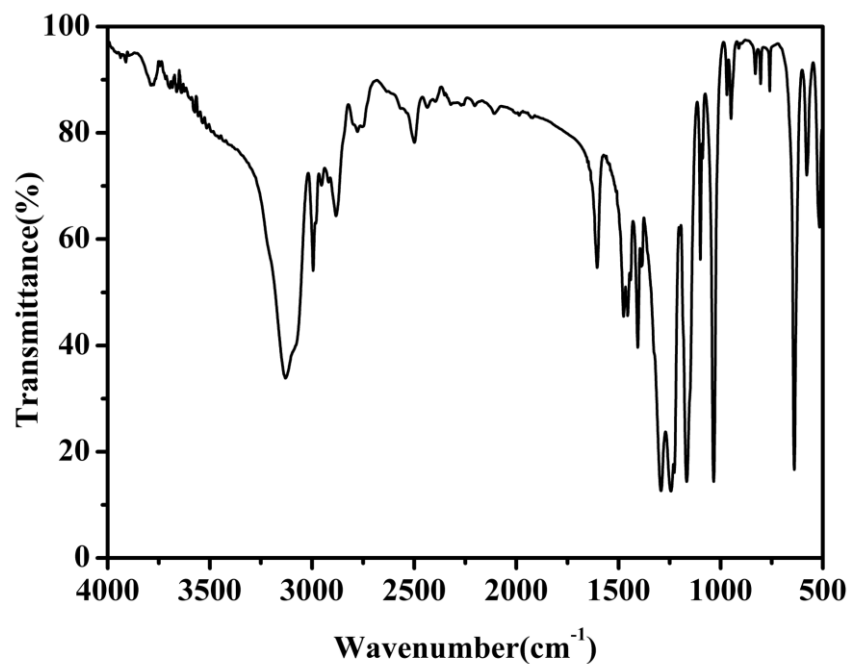

**Figure S2.** The IR spectrum of **1**.

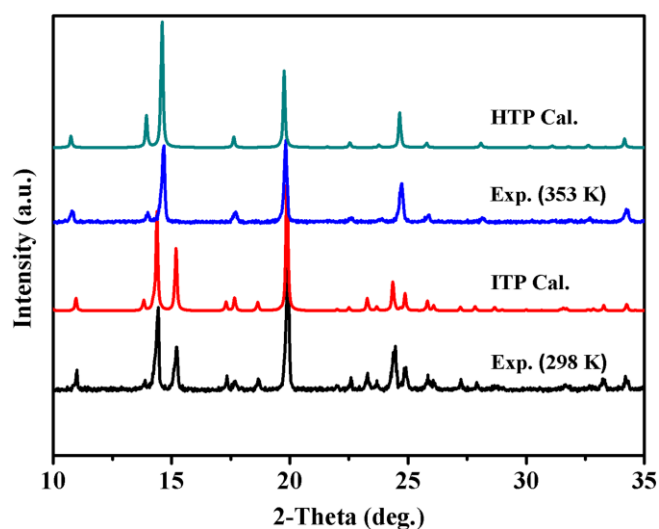

**Figure S3.** The Calculated and experimental PXRD spectra of **1** at different temperatures. The fairly well agreements reveal the occurrence of the HT phase transition.

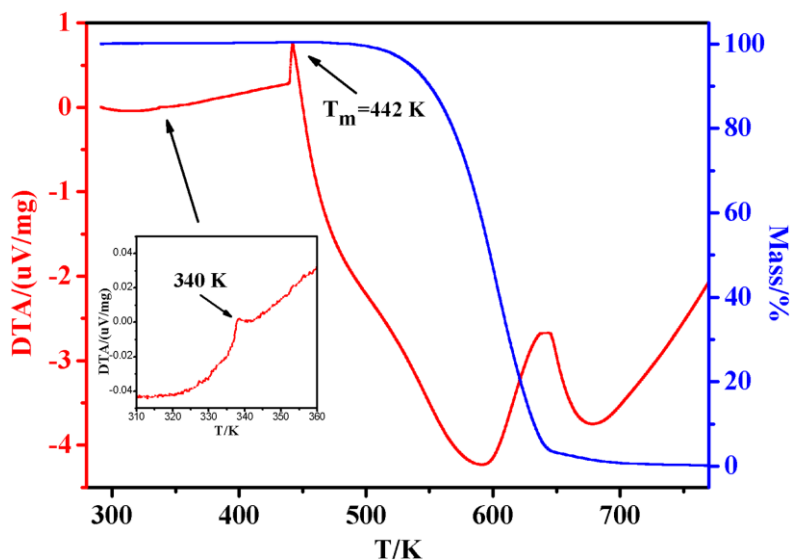

**Figure S4.** Differential thermal analysis (DTA) and Thermo-Gravimetric (TG) curves of 1.

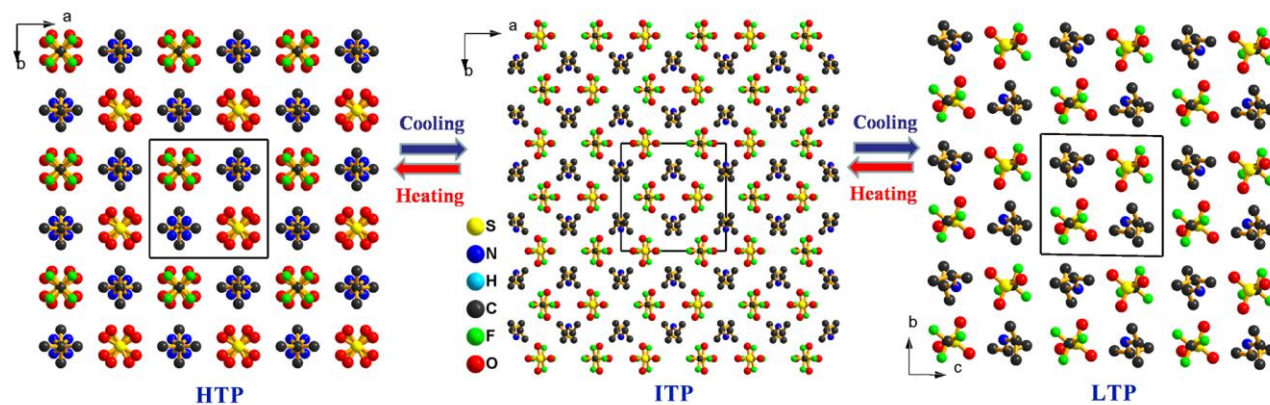

**Figure S5.** Packing diagram of 1 for three temperature phases.

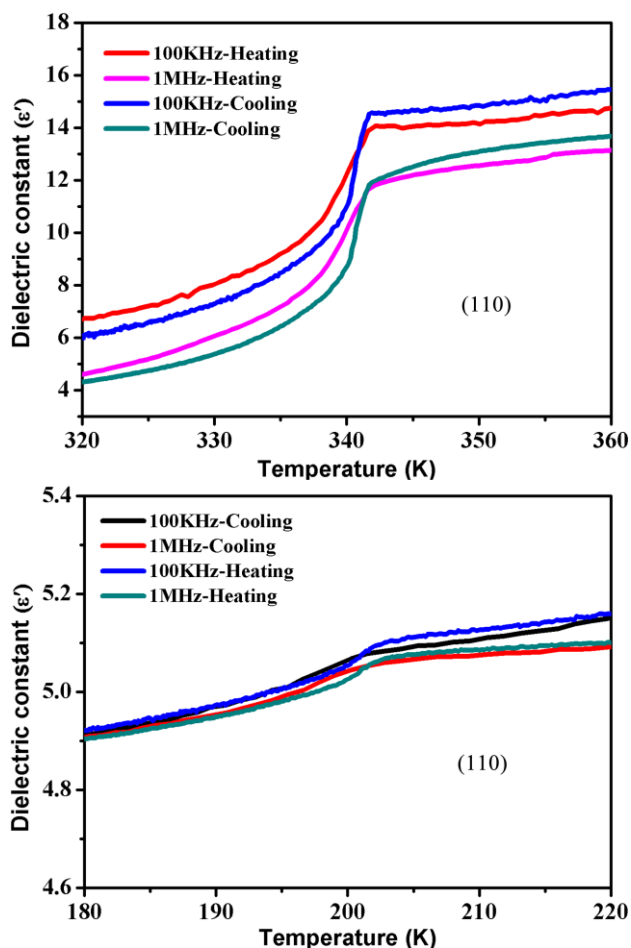

**Figure S6.** Heating and cooling circles of dielectric constant along (110), showing a quite narrow thermal hysteresis for both two phase transitions.

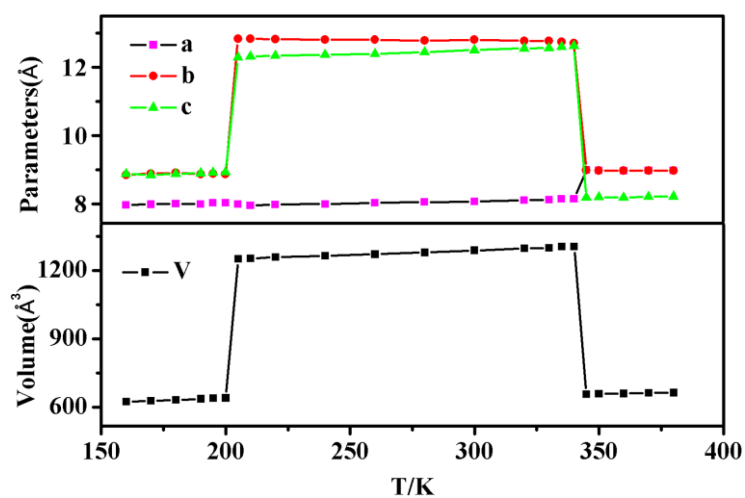

**Figure S7.** Temperature dependence of cell parameter changes for three axis lengths and cell volume in the range from 160 to 380 K in compound 1.
